# Supplementary material for: Jatropha curcas ortholog of tomato MADS-box gene 6 ( JcTM6 ) promoter exhibits floral-specific activity in Arabidopsis thaliana
Source: PeerJ journal article supplement (doi:10.7717/peerj.9827), 2020-09-17
Supplement: Supplemental_File_S2.docx [file Supplemental_File_S2.docx]

The sequence of *JcTM6* promoter

1 AATAGCTATA AAATCAATTT TCAAAATGCG GAACACAACC AAGGAACCTT TTTTGTGAGG

61 CAGATCAGAC TATGCTGCAA CCACAGTGAA TACTTAGTAA CCTTAGCGCT GATACCAACT

121 GTTGTGGAAA TTGGGCTTCT TCCACCAAAT TAAAAACAAT TTGTGAATTA CTGTACTAAG

181 TAACTACACC AGGTAAATTC CCAGATAAGC GGAAGAGTCA CAGGTCTCAC TTAAAATCCA

241 CTTGCCTAGA CAGAATTTAC ATAGACATGC AATTAATCAG ACAATAACCA CCAAAAGTAT

301 TTTGCCCAAC AACAGCTATT AAATAAATAA AAACAAAAGC AATAAATAAA AGAGAAGACC

361 AGAATTTTAA CGAGGTTCGG CCAATTTTTC CTACGTCCTC GGACATTACC AAATTTATAT

421 TTCACTAAAG AAATATACAA ATTGATAGAG CAGAGAAACT TGTCTAACCT ATTAAGTGTT

481 GAAAGACAAG TTGAGACATC TAAAATTGAA GGAGGTAGGC TCCTTATATA GAAGAGAGGC

541 CACCCTCTCC CTTGCTAAAA TCCCGATGTG GGATTGAGCC ACCAAACCAA CGGATCAAAC

601 TCAGCTAAAA CACAAAATAT ATTTTTGAGA TTAAGAATTA CCACCATTTA AGGGATTAAA

661 GACTCCTATG ATTCTGGTGA CTAAAACCTT ATTATCCTCA TAAACATTCG AGCTAAAAGT

721 AATGCCCGAC TTCTCAAAAT TTACAACTTG ACCTGAGGCC TCCTCATAGC AGCTTTTCAC

781 CTTTAATTAA TTAGTTTATT TAGATTCCTT ATATTTTCCA TGAAGCATAC TTTAGACTGA

841 TTCGCTTACA GAATTTGCGA GTTTGCAAGC TTCGAGTCTT CACATTCTTG ATCGCATCAT

901 GATAATATAA TCATAGCTCA TGCATGATGC GGCTAGGATA CTATCCAAAT GGTGTAGTAG

961 CTAGTCTTTT TCTTTTTTTG TTTGCATATT ATAAAAATAA ATAAATAAAC AAACAAAGAA

1021 AATTTGCAAA TTATTCACTG AATACTTCCA TTAATGACTC ATGTAAACTC ATGAACTTCA

1081 CTTGAATGTG AGAAATATAG AAACCTTAGC CAAAATATCT CTAACCAAAA CTAAACGATT

1141 TTCCCATTAG TCTTTTCTAT AAATAAACTA ATGCTTTCCC CATTTCTATA ACCGTGTAAA

1201 CTATCTTTAC TCTCTATTAA CAATAATATA AATCTTGCGA AAAAAAGCAG TACAAAAGTA

1261 TAACATTGCC ATTTCAAGCT TTTCACTGAT AATAAGATTG ATTTGTCCTT ATTAGGCTTT

1321 TGAGCATCAC TGTGTTATCT TTCTCACTAA ATTAAAGATT AAACCCATAA CATAACGACA

1381 AGAATTATTT TCTTAGTTTA TTATATTCCT TCATGTATAA AATGTTCTCA TCATATTACA

1441 TCCATTTAGT TTTACCTAAC ATAATTGTTT ACTTAAAGAG GTTTAAGGAA AGGCCTTGTC

1501 AATCGCATAG CACAAATTGT ACTTTGTAAC AATGTCCTGT CTTCTTCATT GCACTTCCCA

1561 ACATGACACG TTACTGCTAT TAACCCTATC TTGAAACTCT CACTTTCACA AATTTAGCAG

1621 GTATTCTTAG TTACACAACA ACCCACTTTT GCTTTACCTC TCCTGAAATA GAAACTAGTC

1681 TTTTTCTTTA TTTTCTTGCT TTTCTTTCTG CTCTGTTATC TTCAAGAATC AAGAAAAGCC

1741 TATGCTCCAT ACACAAAACA GTTATCCATA TCTCTTCGGT TTTGTAGTAG TGGGTTTTGA

1801 TTATCAAGAA GAAAGGAAAA
