# Supplementary material for: Jatropha curcas ortholog of tomato MADS-box gene 6 ( JcTM6 ) promoter exhibits floral-specific activity in Arabidopsis thaliana
Source: PeerJ journal article supplement (doi:10.7717/peerj.9827), 2020-09-17
Supplement: Supplemental_File_S3.xlsx [file Supplemental_File_S3.xlsx]

## Sheet: Sheet1
	Jatropha tissue samples	Normalized value	Normalized Error
	Roots (R)	6.211	2.387
	Stems (S)	0.0706	0.0218
	Young leaves (YL)	1	0
	Mature leaves (ML)	0.3037	0.1109
	Inflorescence buds (If)	33.21	13.11
	Female flowers (FF)	984.1	318.5
	Male flowers (MF)	3158	1048
	Pericarps at 42 DAP (Pp 42d)	64.21	19.06
	Seeds at 42 DAP (Sd 42d)	3.485	1.101
	Male sepals (MS)	316.7	104.6
	Male petals (MP)	6778	1973
	Stamens (St)	8112	2235
	Female sepals (FS)	38.52	11.59
	Female petals (FP)	7167	1959
	Pistils (Pi)	841.2	257.8
